# Supplementary material for: Cholangiocyte-Derived Exosomal lncRNA H19 Promotes Macrophage Activation and Hepatic Inflammation under Cholestatic Conditions
Source: PubMed Central journal article supplement (PMC7016679; doi:10.3390/cells9010190), 2020-01-11

## Supplementary figure legends

### Supplementary figure 1. Effects of exosomal H19 on CCR-2 expression in

**Kupffer cells.** Mouse Kupffer cells were treated with control MLE-derived exosomes (CtExo) or H19-overexpressing MLE-derived exosomes (H19Exo) for 24 h. The relative mRNA level of CCR-2 was measured by real-time RT-PCR and normalized using HPRT1. Results from at least 3 independent experiments are presented as Mean  $\pm$  SEM. Statistical significance: \*\*\* $P$ <0.001, compared with WT control group; & $P$ <0.05, compared with the H19KO control group.

### Supplementary figure 2. Effects of exosomal H19 and LPS on Kupffer cell

**activation.** Mouse Kupffer cells were treated with CtExo, H19Exo with or without LPS (10 ng/ml) for 24 h. **(A)** The levels of TNF- $\alpha$  in the conditioned medium of Kupffer cells were measured by ELISA assay and normalized using protein concentration. **(B-D)** The relative mRNA levels of IL12p40, CXCL10 and CCL-5 were measured by real-time RT-PCR and normalized using HPRT1. Results from at least 3 independent experiments are presented as Mean  $\pm$  SEM. Statistical significance: \*\* $P$ <0.01, \*\*\* $P$ <0.001, compared with WT control group; # $P$ <0.05, compared with WT H19Exo group; & $P$ <0.05, && $P$ <0.01, compared with H19KO control group.

### Supplementary figure 3. Effects of exosomal H19 on TNF- $\alpha$ and CXCL10

**expression in BMDMs.** Mouse BMDM cells were treated with CtExo, H19Exo, M1 (LPS, 10 ng/ml and IFN- $\gamma$ , 100 ng/ml) or M2 stimulators (IL-4, 20 ng/ml and IL-13, 20 ng/ml) for 24 h. The relative mRNA level of TNF- $\alpha$  **(A)** and CXCL10 **(B)** was measured by real-time RT-PCR and normalized using HPRT1. Results from at least

3 independent experiments are presented as Mean  $\pm$  SEM. Statistical significance: \*\*\* $P$ <0.001, compared with WT control group; &&& $P$ <0.001, compared with H19KO control group; \$\$ $P$ <0.01, compared with WT H19Exo group.

**Supplementary figure 4. Effects of exosomal H19 on H19 expression and cell migration in BMDMs.** WT and H19KO BMDM cells were isolated and cultured for 7 days. BMDMs were then changed fresh differentiation medium with CtExo or H19Exo and collected on day 9 and 12. On day 14, BMDMs were treated with CtExo or H19Exo and M1 stimulators for 24 h. **(A)** The relative mRNA levels of H19 in H19KO BMDM were measured by real-time RT-PCR and normalized using HPRT1. **(B)** Relative migration area. Results from at least 3 independent experiments are presented as Mean  $\pm$  SEM. Statistical significance: \* $P$ <0.05, \*\* $P$ <0.01, \*\*\* $P$ <0.001, compared with WT control group.

**Supplementary figure 5. Effect of Bindarit and anti-CCL-2 antibody on exosomal H19-induced macrophage migration.** Mouse Kupffer cells were treated with CtExo or H19Exo for 24 h, with or without pretreatment of Bindarit (Bin, 300  $\mu$ M) **(A)** and purified CCL-2 antibody (20  $\mu$ g/ml) **(B)** for 2 h. **(A-B)** The relative migration area is shown. Results from at least 3 independent experiments are presented as Mean  $\pm$  SEM. Statistical significance: \* $P$ <0.05, compared with the control group; # $P$ <0.05, compared with H19Exo group.

**Supplementary figure 6. Hepatic mRNA levels of inflammatory factors in Mdr2<sup>-/-</sup> mice.** WT, H19KO, Mdr2<sup>-/-</sup> mice, and DKO mice (both male and female at 100-day old) were sacrificed. **(A-C)** The relative mRNA levels of CD11b, CXCL10 and CD86,

were determined by real-time RT-PCR and normalized using HPRT1 as an internal control. Results from at least 3 independent experiments are presented as Mean  $\pm$  SEM. Statistical significance: \*\*\* $P$ <0.001, compared with WT mice; # $P$ <0.05, ## $P$ <0.01, ### $P$ <0.001, compared with Mdr2<sup>-/-</sup> mice.

**Supplementary figure 7. Gating strategy for the identification of hepatic cells by FACS.** Negative control for the detection of CD45 (APC-Cy7), F4/80 (561-610), CD11b (FITC-A) and CCR-2 (Alexa 647-A). Representative graphs are shown.

**Supplementary figure 8. Flow cytometry analysis of Mdr2<sup>-/-</sup> mice.** WT, H19KO, Mdr2<sup>-/-</sup> mice and DKO mice (both male and female at 100-day old) were sacrificed. **(A, B)** Representative flow cytometry images of the percentage of indicated cells in all monocytes are shown (n>6).

**Supplementary figure 9. Flow cytometry analysis of BDL mice.** Both WT and H19KO mice (both male and female at 12 weeks old) were subjected to sham operation or BDL for 2 weeks. **(A, B)** Representative flow cytometry images of the percentage of indicated cells in all monocytes are shown (n>6).

**Supplementary Table 1. List of antibodies**

| <b>Antibody</b>                  | <b>Species</b> | <b>Source</b>              | <b>Catalog #</b> | <b>Application/ dilution</b>                    |
|----------------------------------|----------------|----------------------------|------------------|-------------------------------------------------|
| CCL-2                            | Mouse          | Santa Cruz                 | MA5-17040        | WB (1:1000)                                     |
| CCR-2                            | Rabbit         | Abcam                      | ab203128         | WB (1:1000)                                     |
| CD45-APC/Cy7                     | Mouse          | Biologend                  | 103116           | Flow cytometry<br>(0.2µg/10 <sup>6</sup> cells) |
| CD16/CD32                        | Mouse          | BD Biosciences             | 553142           | Flow cytometry<br>(1µg/10 <sup>6</sup> cells)   |
| F480-Alexa Fluor<br>594          | Mouse          | Biologend                  | 123140           | Flow cytometry<br>(0.2µg/10 <sup>6</sup> cells) |
| CD11b-FITC                       | Mouse          | Biologend                  | 101206           | Flow cytometry<br>(0.2µg/10 <sup>6</sup> cells) |
| CD192 (CCR2)-<br>Alexa Fluor 647 | Mouse          | Biologend                  | 150604           | Flow cytometry<br>(0.2µg/10 <sup>6</sup> cells) |
| β-actin (JLA20)                  | Mouse          | DSHB University<br>of Iowa | JLA20            | WB (1:500)                                      |

## Supplementary figure 1

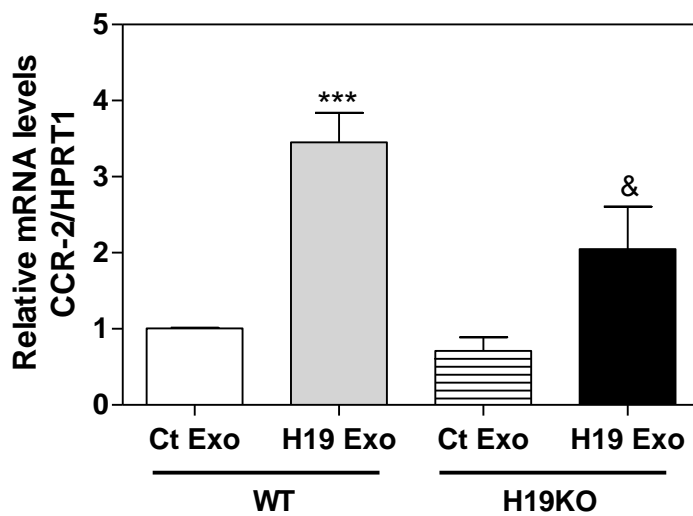

## Supplementary figure 2

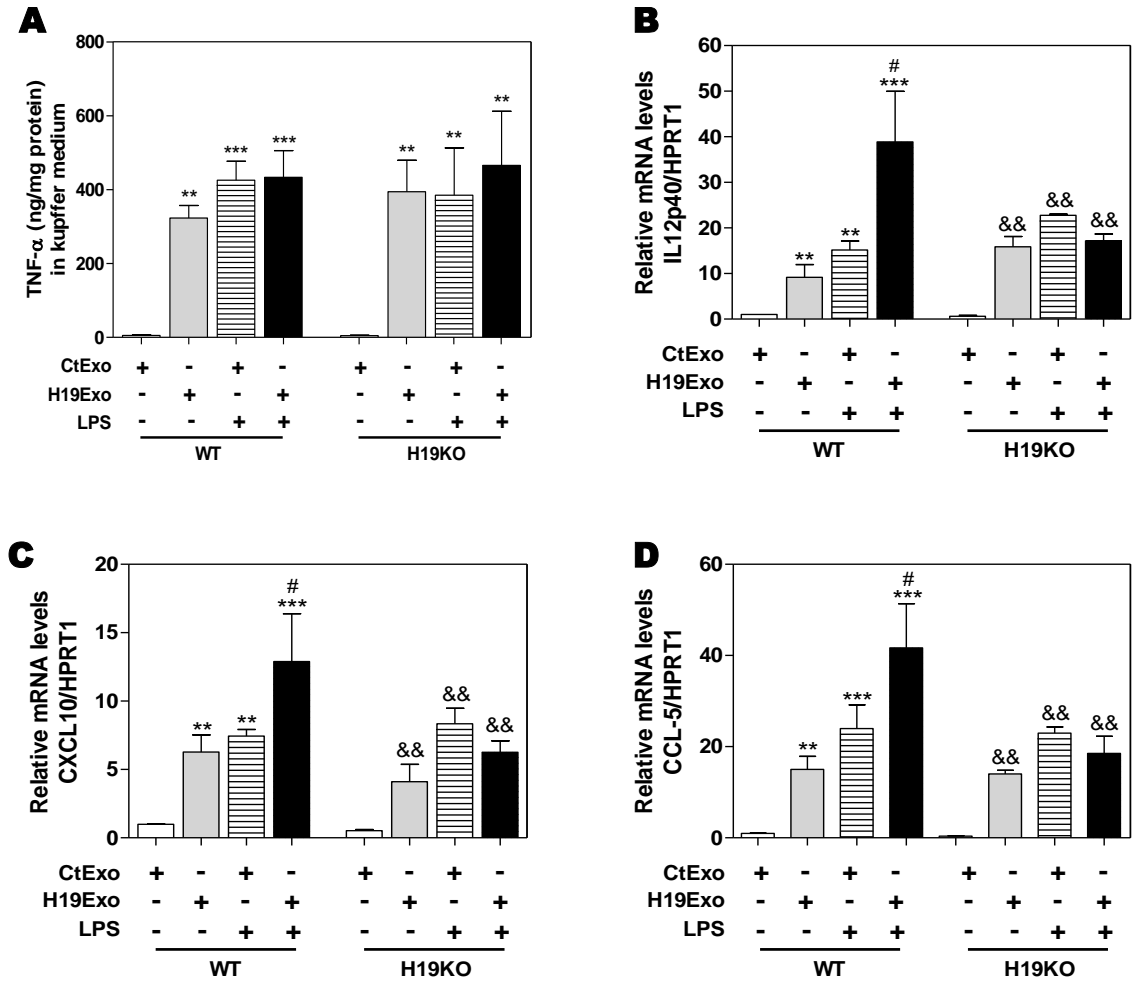

# Supplementary figure 3

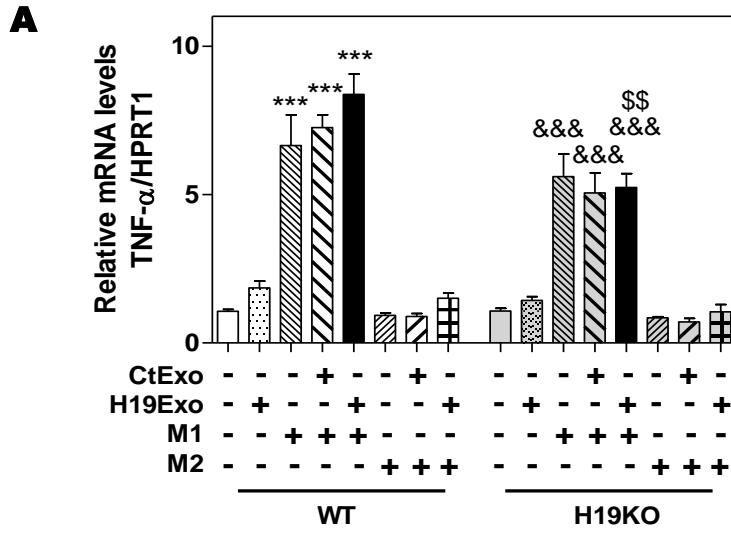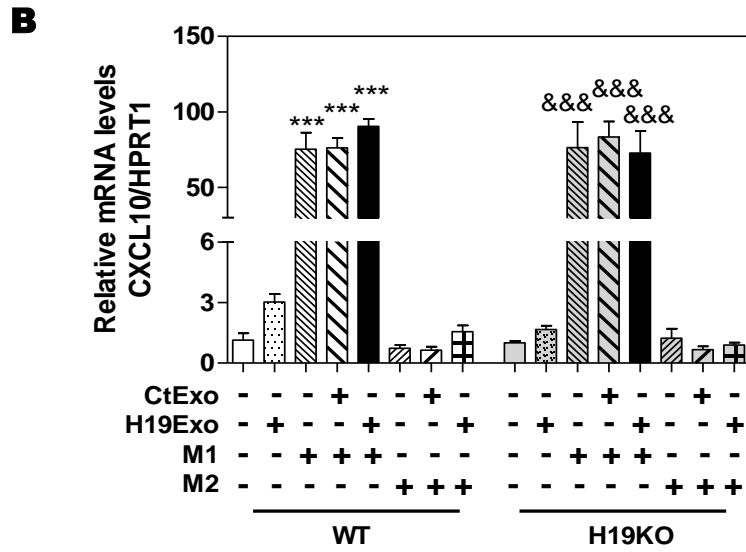

# Supplementary figure 4

**A**

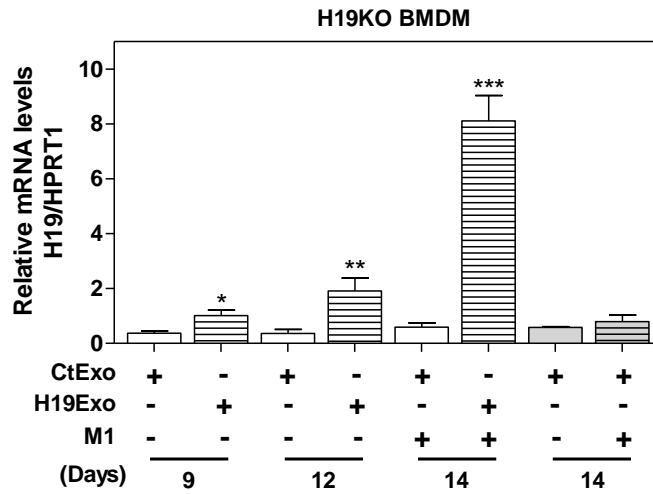

**B**

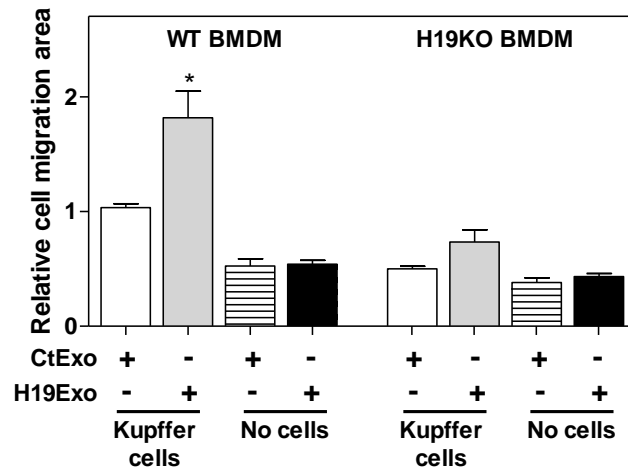



## Supplementary figure 5

**A**

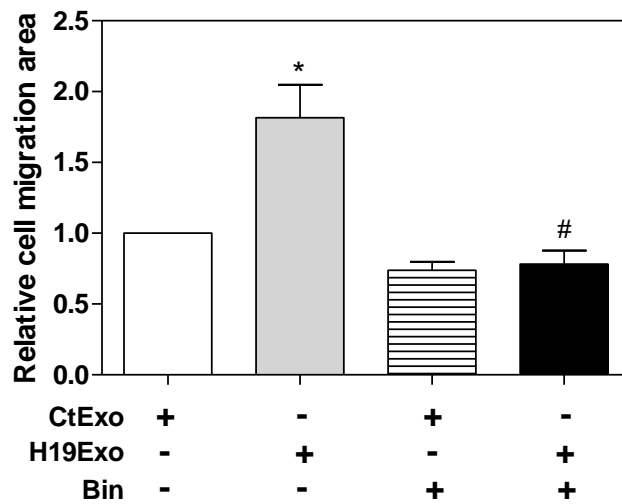

**B**

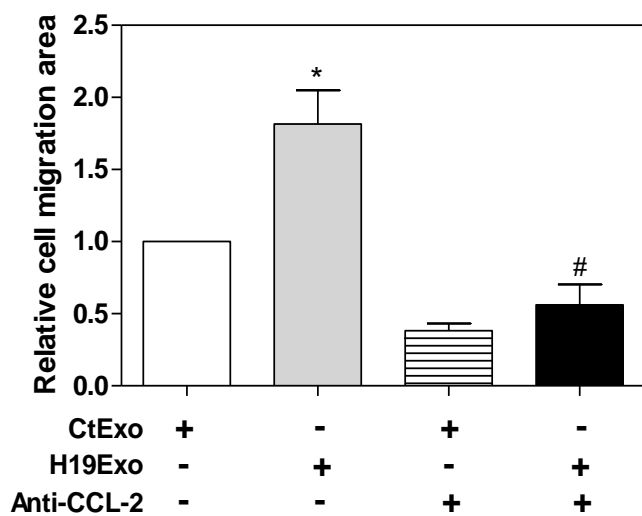

## Supplementary figure 6

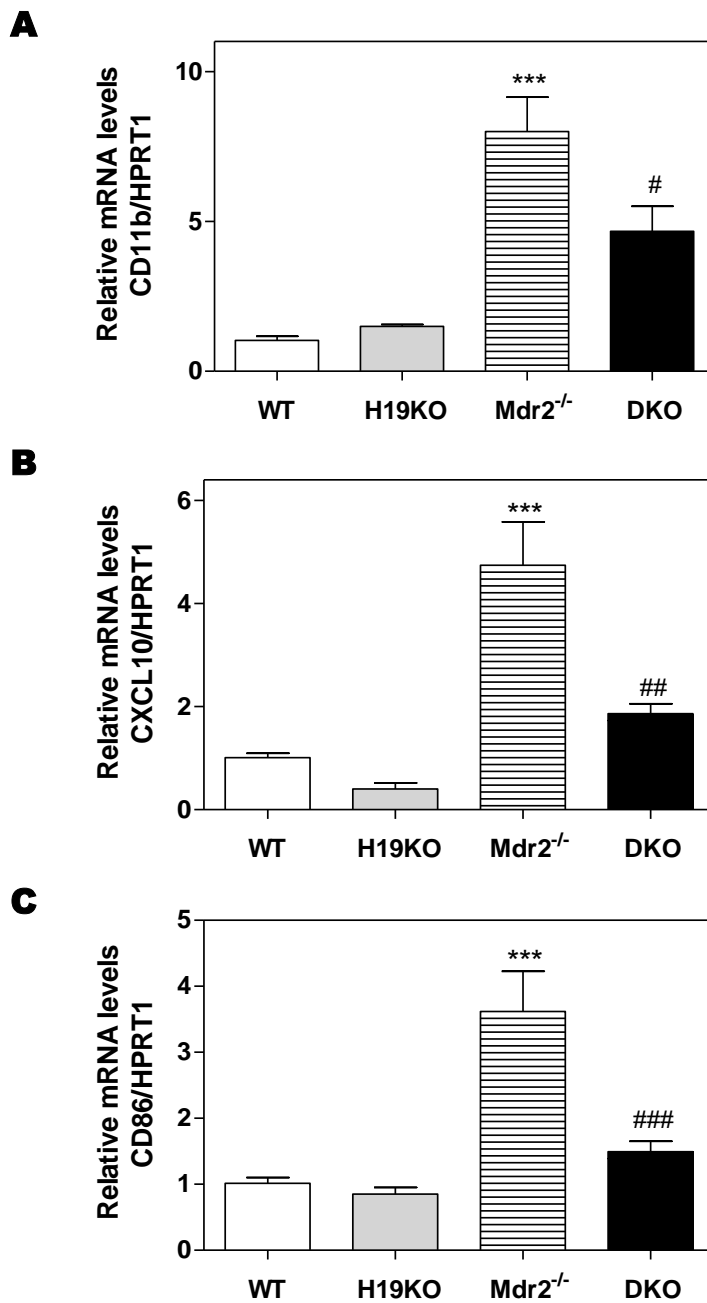

## Supplementary figure 7

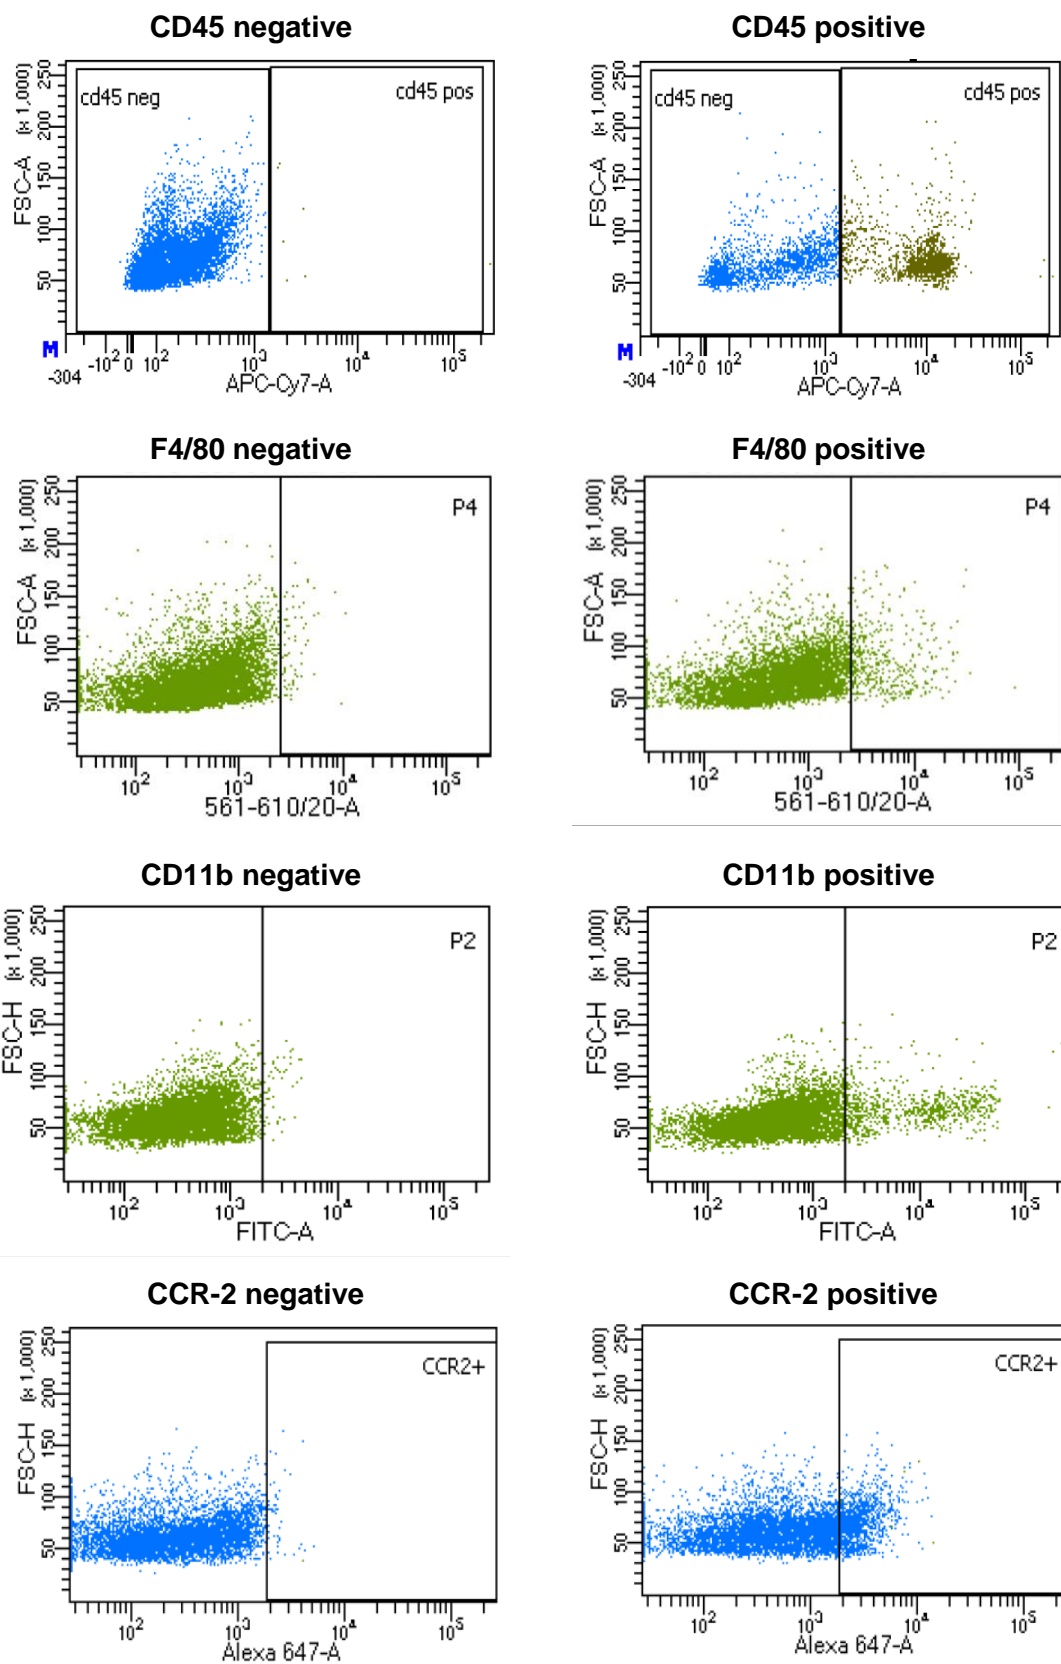

# Supplementary figure 8

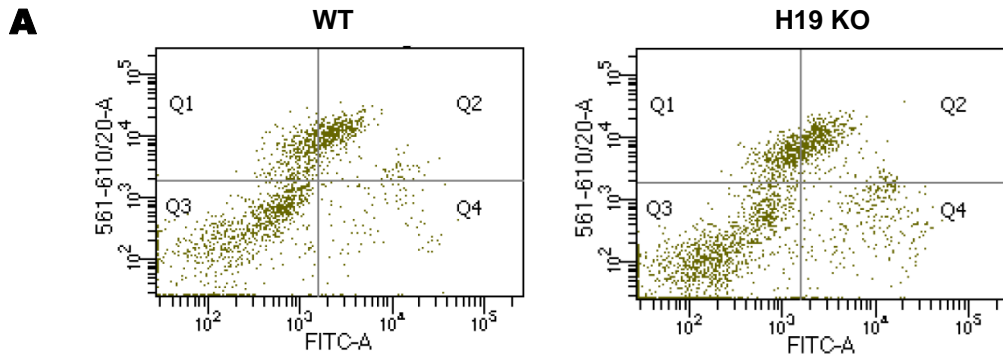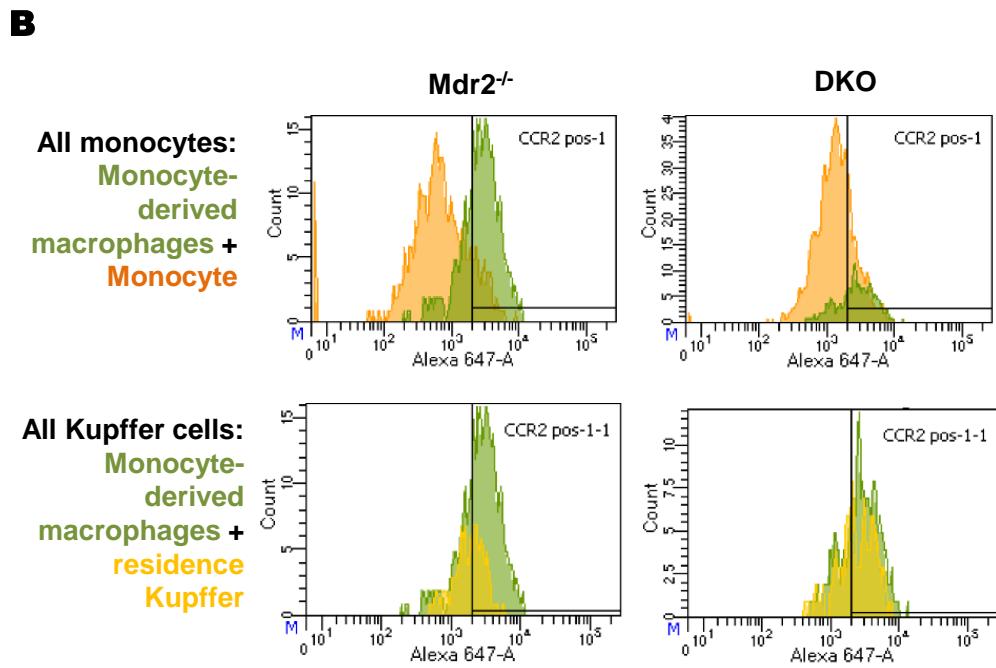

# Supplementary figure 9

**A**

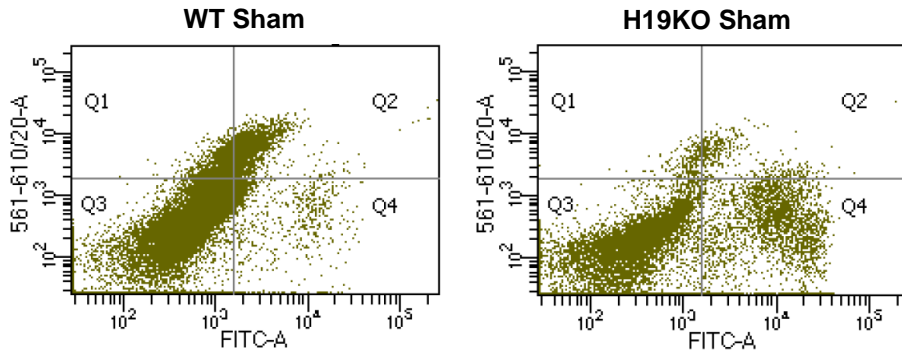

**B**

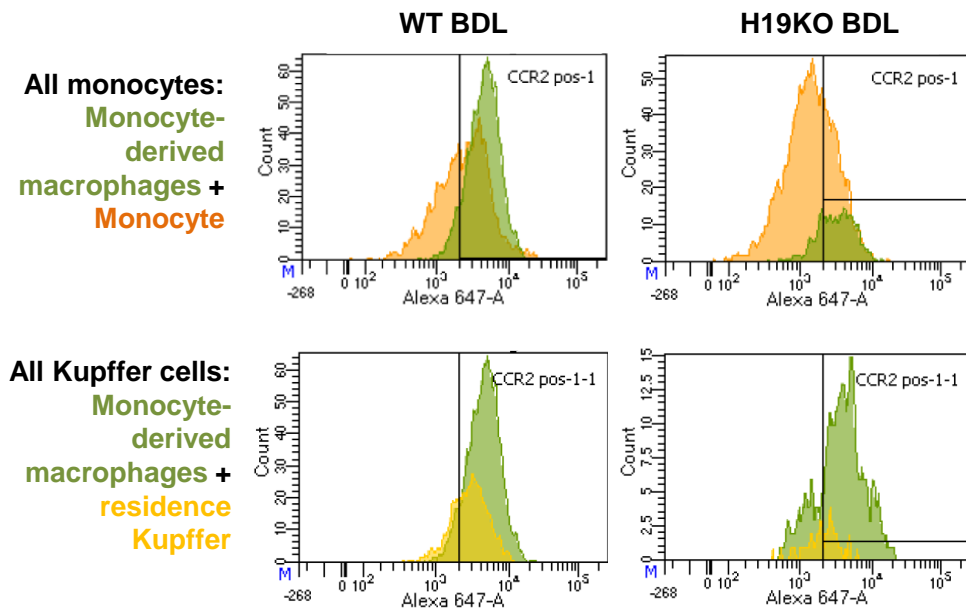

Supplement: cells-09-00190-s001.pdf [file cells-09-00190-s001.pdf]
